# Supplementary material for: Large-Scale In Silico Mapping of Complex Quantitative Traits in Inbred Mice
Source: PubMed Central journal article supplement (PMC1920557; doi:10.1371/journal.pone.0000651), 2007-07-25

**A**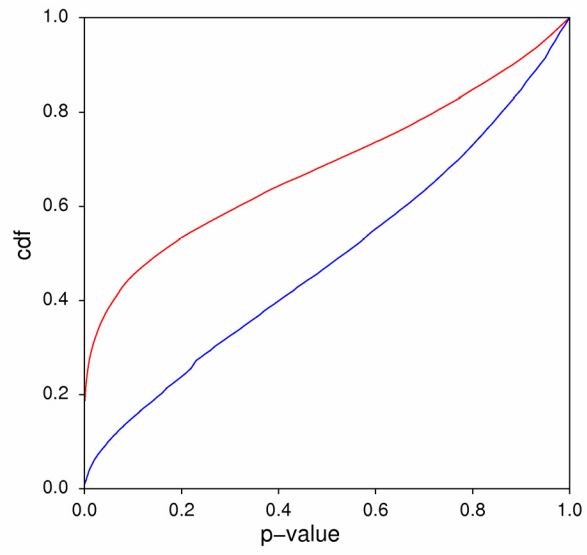**B**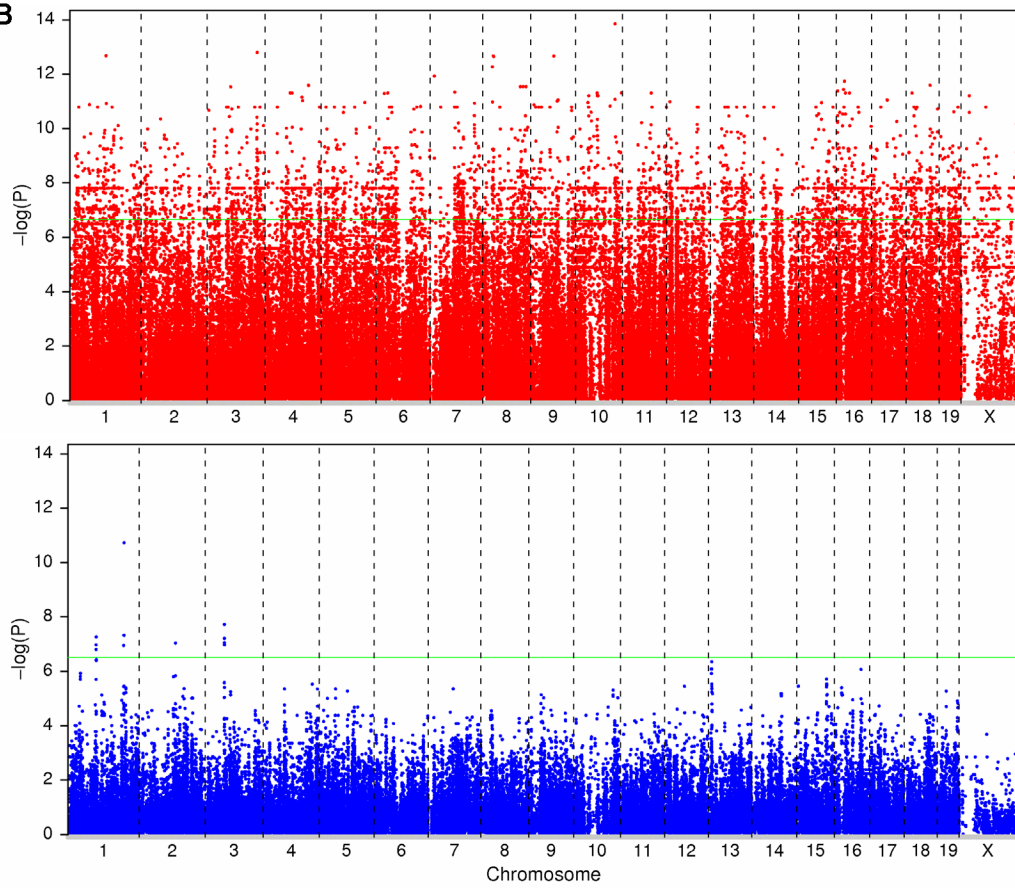

Supplement: pone.0000651.s010.pdf [file pone.0000651.s010.pdf]
