# Supplementary material for: Large-Scale In Silico Mapping of Complex Quantitative Traits in Inbred Mice
Source: PubMed Central journal article supplement (PMC1920557; doi:10.1371/journal.pone.0000651), 2007-07-25

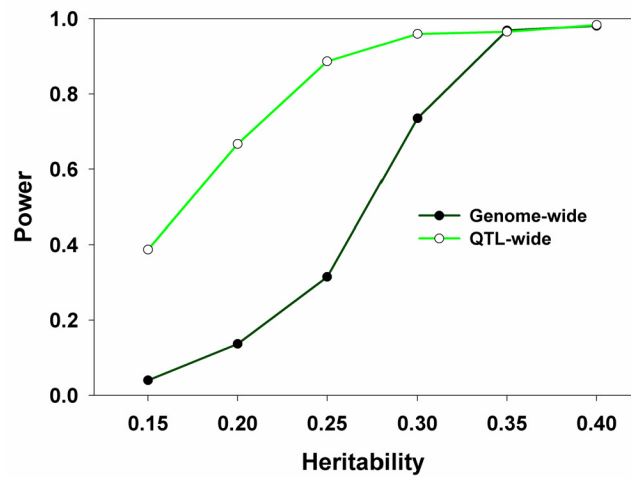

Supplement: pone.0000651.s011.pdf [file pone.0000651.s011.pdf]
